# Supplementary material for: Genes Important for Catalase Activity in Enterococcus faecalis
Source: PubMed Central journal article supplement (PMC3349705; doi:10.1371/journal.pone.0036725), 2012-05-10
Supplement: pone.0036725.s001.pdf [file pone.0036725.s001.pdf]

**Table S1.** List of primers.

| <b>Name</b>       | <b>Sequence</b>                  |
|-------------------|----------------------------------|
| <b>InvCATR2</b>   | 5'-GCTCTGCAACTTCATCATTCTG-3'     |
| <b>InvGFPR1</b>   | 5'-CTTCACCCTCTCCACTGACA-3'       |
| <b>InvISS1fwd</b> | 5'-CGGATTTTCGGTATCTACTGAG-3'     |
| <b>InvISS1rev</b> | 5'-CAGAAAACCTTGCAACAGAACC-3'     |
| <b>TetL01</b>     | 5'-AAAAGATTAAATTATTGCTTGGTG-3'   |
| <b>TetL02</b>     | 5'-AAAGGATCAATTTTGAACCTCTC-3'    |
| <b>CydA03</b>     | 5'-CTGCAGCCGATTGAACCGAACAAAGT-3' |
| <b>CydA04</b>     | 5'-CTCGAGGGGGTTGTAACCGGGATTAT-3' |
| <b>CydD03</b>     | 5'-AAGCTTGCCACGATCAATTCGGTAAA-3' |
| <b>CydD04</b>     | 5'-GGATCCGAGGCATTTGGTGAGACGAT-3' |
| <b>Cyd01</b>      | 5'-TGCTTTAATCAACAACCAGTCG-3'     |
| <b>Cyd02</b>      | 5'-AGGCAAATCAGGGAGGAAAT-3'       |
| <b>KatA03</b>     | 5'-CGCTGAATGACCAATAAAAACG-3'     |
| <b>KatA04</b>     | 5'-CCCAACTAGCTTAGCAAACAAC-3'     |
| <b>KatAR01</b>    | 5'-TCATCGTGCCAACCTCAATC-3'       |
