# Supplementary material for: Genes Important for Catalase Activity in Enterococcus faecalis
Source: PubMed Central journal article supplement (PMC3349705; doi:10.1371/journal.pone.0036725), 2012-05-10
Supplement: pone.0036725.s002.pdf [file pone.0036725.s002.pdf]

**Table S2.** Loci for which a single transposon insertion was found. Colonies of all strains showed decreased catalase activity on hemin-supplemented plates. Catalase activity and KatA content in cell extracts are expressed as fraction relative to those of the parental strain OG1RF.

| Locus tag <sup>a</sup> | Gene        | Annotated function                                                     | Strain              | Tn insertion position in genome <sup>a</sup> | Catalase activity <sup>b</sup> | KatA protein      |
|------------------------|-------------|------------------------------------------------------------------------|---------------------|----------------------------------------------|--------------------------------|-------------------|
| OG1RF_10055            | <i>glmU</i> | UDP-N-acetylglucosamine diphosphorylase                                | EMB28               | 59,086                                       | 0.53                           | 0.49              |
| OG1RF_10137            |             | ABC superfamily ATP binding cassette transporter, ABC protein          | EMB42               | 150,281                                      | 0.30                           | 0.34              |
| OG1RF_10209            | <i>ftsH</i> | Cell division protein FtsH                                             | EMB39               | 207,258                                      | 0.31                           | 0.77              |
| OG1RF_10851            | <i>galT</i> | UDP-glucose--hexose-1-phosphate uridylyltransferase                    | EMB19               | 892,863                                      | 0.17                           | 0.45              |
| OG1RF_10957            | <i>rnjB</i> | Ribonuclease J2                                                        | EMB29               | 998,933                                      | 0.64                           | 0.33              |
| OG1RF_11664            | <i>cydC</i> | ABC superfamily ATP binding cassette transporter, ABC/membrane protein | EMB4 <sup>c,d</sup> | 1,735,103                                    | 0.01 <sup>d</sup>              | 0.01 <sup>d</sup> |
| OG1RF_11691            |             | FemAB family peptidoglycan biosynthesis protein                        | EMB9                | 1,763,492                                    | 0.25                           | 0.75              |
| OG1RF_11704            | <i>miaA</i> | tRNA isopentenyltransferase                                            | EMB25               | 1,782,613                                    | 0.08                           | 0.25              |
| OG1RF_12095            |             | CBS domain protein                                                     | EMB30               | 2,215,959                                    | 0.27                           | 0.11              |
| OG1RF_12228            | <i>folC</i> | Tetrahydrofolate synthase                                              | EMB43 <sup>c</sup>  | 2,346,976                                    | 0.27                           | 0.16              |
| OG1RF_12365            | <i>rnc2</i> | Ribonuclease III                                                       | EMB38               | 2,502,158                                    | 0.60                           | 0.75              |
| OG1RF_12384            |             | Non-specific serine/threonine protein kinase                           | EMB21 <sup>c</sup>  | 2,523,714                                    | 0.28                           | 0.67              |
| OG1RF_12532            | <i>mdeA</i> | Putative methionine gamma-lyase                                        | EMB31               | 2,682,810                                    | 1.16                           | 0.54              |

<sup>a</sup> GenBank: CP002621.1.

<sup>b</sup> Catalase activity of strain OG1RF was 14 U/mg of protein.

<sup>c</sup> *ISSI* system.

<sup>d</sup> Point mutation in *katA*.
